# Supplementary material for: MoS2quantum dots for electrocatalytic N2reduction
Source: Royal Society of Chemistry journal article supplement (doi:10.1039/d1cc03795a), 2021-01-01
Supplement: d1cc03795a1.pdf [file d1cc03795a1.pdf]

# Supporting Information

## **MoS<sub>2</sub> Quantum Dots for electrocatalytic N<sub>2</sub> reduction**

Yaojing Luo<sup>#</sup>, Peng Shen<sup>#</sup>, Xingchuan Li, Yali Guo, Ke Chu\*

*School of Materials Science and Engineering, Lanzhou Jiaotong University, Lanzhou 730070, China*

\*Corresponding author. E-mail address: chukelut@163.com (K. Chu)

<sup>#</sup> These authors contributed equally to this work.

## Experimental Section

### Synthesis of MoS<sub>2</sub> QDs

All the chemicals are of analytical grade and used as received. MoS<sub>2</sub> QDs were synthesized by a one-step microwave-assisted hydrothermal approach. Typically, 0.121 g of Na<sub>2</sub>MoO<sub>4</sub>·2H<sub>2</sub>O were dispersed in 12.5 mL of deionized water followed by adjusting the pH to 6.5 with 0.1 M HCl. Then, 0.615 g of glutathione (GSH) was dissolved in 25 ml of deionized water. Afterwards, the above two solutions were mixed and sealed into a quartz tube, which were reacted for 30 min under microwave irradiation (2450 MHz). After cooling to room temperature, the mixture was collected by centrifugation, filtered through a 0.22 μm microporous membrane and further purified by dialyzing in deionized water. The solution was eventually concentrated by a rotatory evaporator and freeze-dried to obtain MoS<sub>2</sub> QDs.

### Electrochemical experiments

Electrochemical measurements were performed under ambient conditions using a CHI-760E electrochemical workstation with a three-electrode cell. The Ag/AgCl (saturated KCl), graphite rod and catalyst on carbon cloth (CC) were used as reference, counter and working electrodes, respectively. The CC was pretreated by soaking it in 0.5 M H<sub>2</sub>SO<sub>4</sub> for 12 h, and then washed with deionized water several times and dried at 60 °C for 24 h. All potentials were referenced to reversible hydrogen electrode (RHE) by following equation:  $E_{\text{RHE}} \text{ (V)} = E_{\text{Ag/AgCl}} + 0.197 + 0.059 \times \text{pH}$ . To prepare the working electrode, 1 mg of the catalyst was dispersed in 100 μL of ethyl alcohol containing 5 μL of Nafion (5 wt%) under sonication. The obtained homogeneous catalyst ink (20 μL) was dropped onto the pretreated CC electrode. The mass loading was 0.2 mg cm<sup>-2</sup>. The NRR measurements were carried out using an H-type two-compartment electrochemical cell separated by a Nafion 211 membrane. The Nafion membrane was pretreated by heating it in 5% H<sub>2</sub>O<sub>2</sub> aqueous solution at 80 °C for 1 h and then in deionized water at 80 °C for another 1 h. Before the NRR tests, all the feeding gases were purified through acid trap (0.05 M H<sub>2</sub>SO<sub>4</sub>) and alkaline trap (0.1 M KOH) to remove any possible contaminants (NH<sub>3</sub> and NO<sub>x</sub>). During the NRR

electrolysis, the purified N<sub>2</sub> gas was continuously purged into the cathodic chamber at a flow rate of 20 mL min<sup>-1</sup>. After electrolysis, the produced NH<sub>3</sub> and possible N<sub>2</sub>H<sub>4</sub> were quantitatively determined by the indophenol blue method[1], and approach of Watt and Chrisp[2], respectively. The detailed determination procedures are given in our previous publications [3-5].

### Characterizations

Raman spectra were conducted on a JY-HR800 spectroscopy. X-ray photoelectron spectroscopy (XPS) analysis was recorded on a PHI 5702 spectrometer. Transmission electron microscopy (TEM) and high-resolution transmission electron microscopy (HRTEM) were carried out on a Tecnai G<sup>2</sup> F20 microscope. Fluorescence spectra were recorded on an F-4700 fluorescence spectrophotometer. UV-vis absorbance measurements were performed using a MAPADA P5 spectrophotometer.

### Calculation details

All spin-polarized density functional theory (DFT) calculations were performed using the Cambridge sequential total energy package (CASTEP). The exchange-correlation interactions were described by the Perdew–Burke–Ernzerhof (PBE) functional. Electronic energies were computed with the tolerance of 2×10<sup>-5</sup> and total forces were converged to less than 0.05 eV/Å. The 4×4×1 Monkhorst-Pack mesh was used in Brillouin zone sampling. The kinetic cutoff energy for the plane wave basis was set at 500 eV. The MoS<sub>2</sub> nanocluster model derived from the layered MoS<sub>2</sub> is constructed to simulate the MoS<sub>2</sub> QDs. A vacuum region of 15 Å was used to separate adjacent slabs.

The adsorption energy ( $\Delta E$ ) is defined as [6]

$$\Delta E = E_{\text{ads/slab}} - E_{\text{ads}} - E_{\text{slab}} \quad (1)$$

where  $E_{\text{ads/slab}}$ ,  $E_{\text{ads}}$  and  $E_{\text{slab}}$  are the total energies for adsorbed species on slab, adsorbed species and isolated slab, respectively.

The Gibbs free energy ( $\Delta G$ , 298 K) of reaction steps is calculated by [6]:

$$\Delta G = \Delta E + \Delta ZPE - T\Delta S \quad (2)$$

where  $\Delta E$  is the adsorption energy,  $\Delta ZPE$  is the zero point energy difference and  $T\Delta S$

is the entropy difference between the gas phase and adsorbed state. The entropies of free gases were acquired from the NIST database.

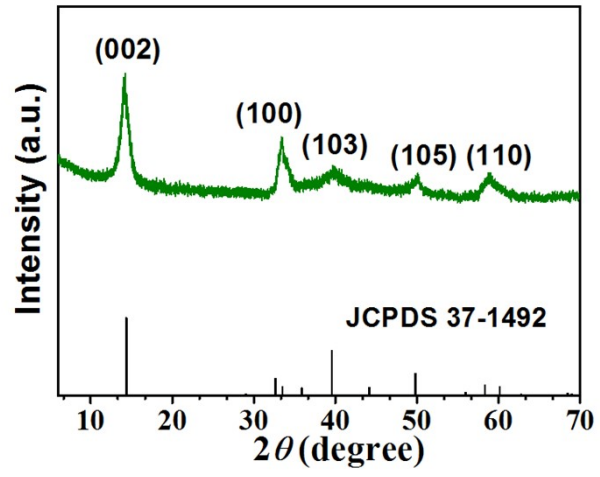

Fig. S1. XRD pattern of MoS<sub>2</sub> QDs.

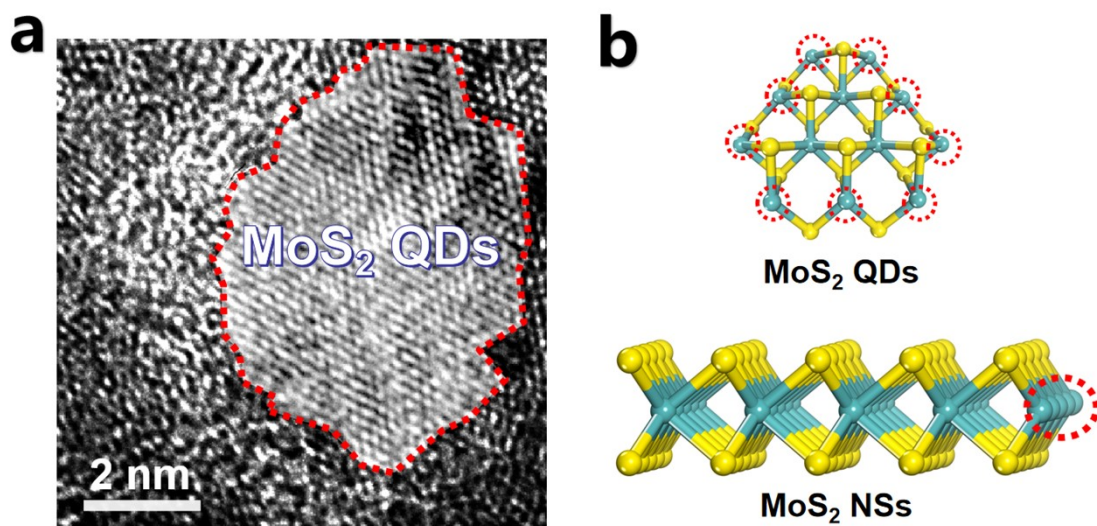

Fig. S2. (a) HRTEM image of MoS<sub>2</sub> QDs. (b) Atomic models of MoS<sub>2</sub> QDs and MoS<sub>2</sub> nanosheets (NSs), showing that MoS<sub>2</sub> QDs enable the exposure of more edge sites than MoS<sub>2</sub> nanosheets NSs.

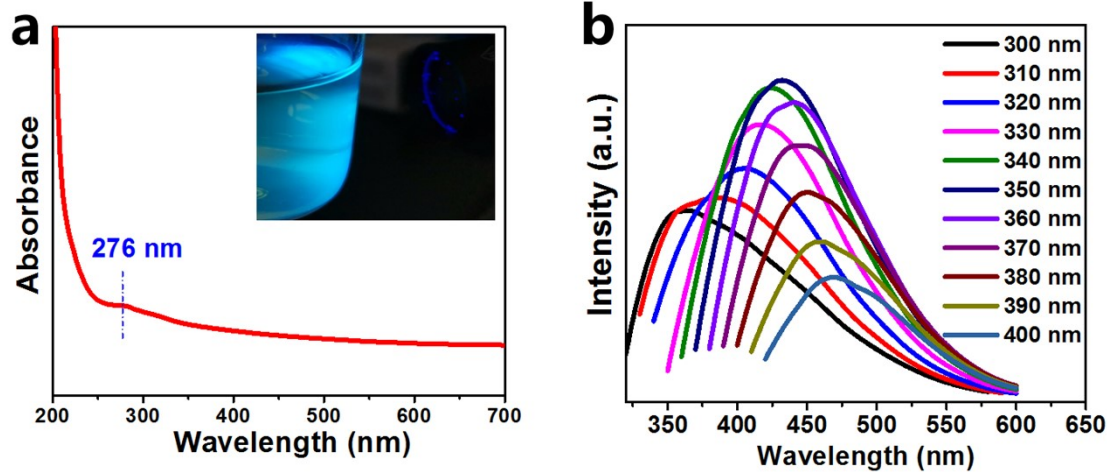

Fig. S3. (a) UV-vis spectra of MoS<sub>2</sub> QDs (Inset: digital photograph of MoS<sub>2</sub> QDs solution irradiated by UV light). (b) Photoluminescence emission spectra of MoS<sub>2</sub> QDs at the excitation wavelengths of 300-400 nm.

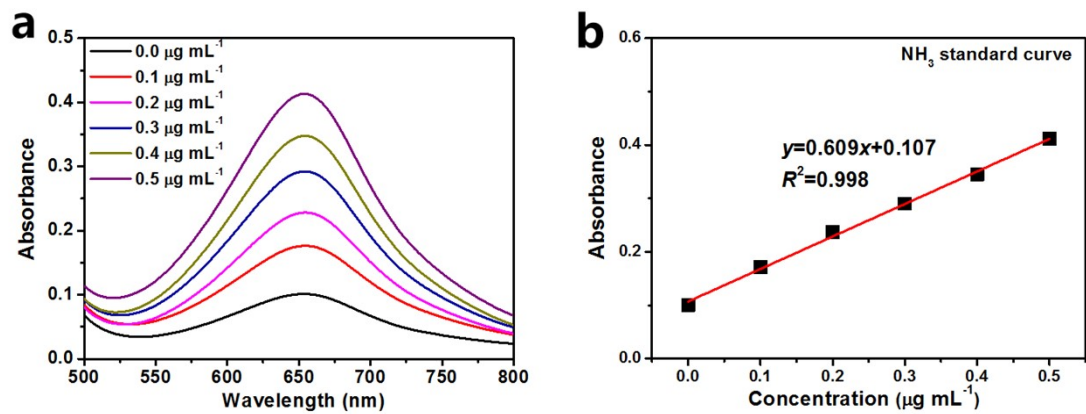

Fig. S4. (a) UV-Vis absorption spectra of indophenol assays with  $\text{NH}_4\text{Cl}$  after incubated for 2 h at ambient conditions. (b) Calibration curve used for calculation of  $\text{NH}_3$  concentrations.



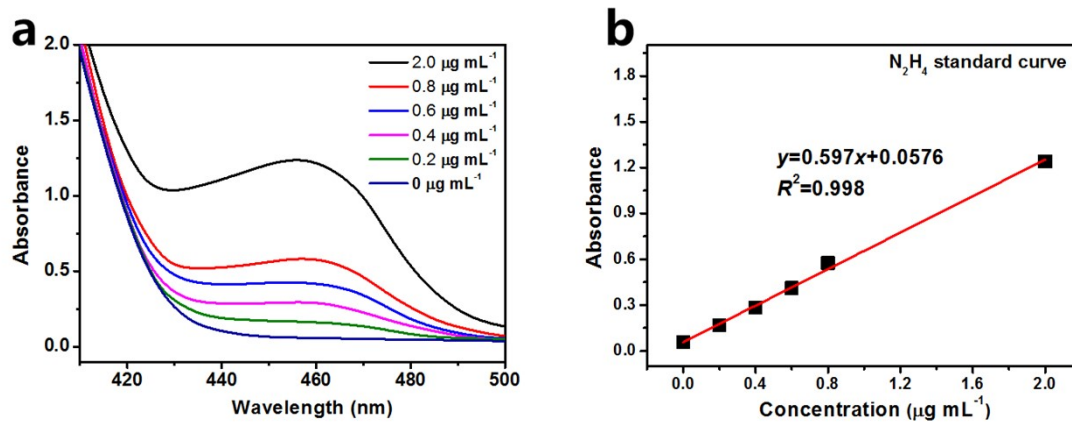

Fig. S5. (a) UV-vis absorption spectra of  $N_2H_4$  assays after incubated for 20 min at ambient conditions. (b) Calibration curve used for calculation of  $N_2H_4$  concentrations.

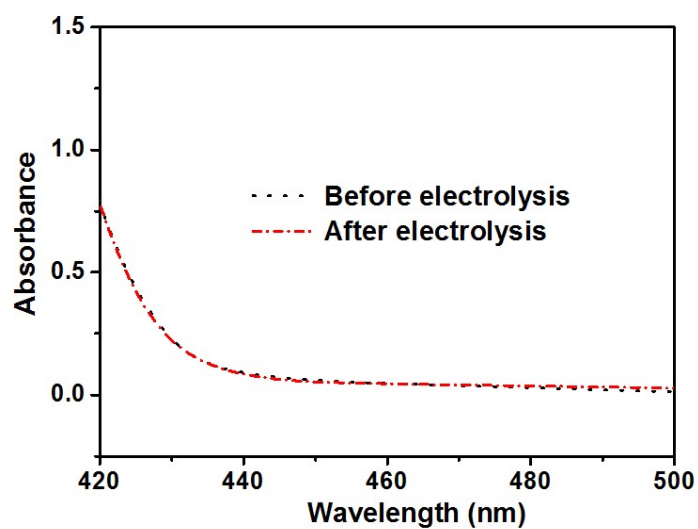

Fig. S6. UV-vis spectra of the electrolytes (stained with the chemical indicator based on the method of Watt and Chrisp) before and after 2 h of NRR electrolysis over MoS<sub>2</sub> QDs at -0.3 V.

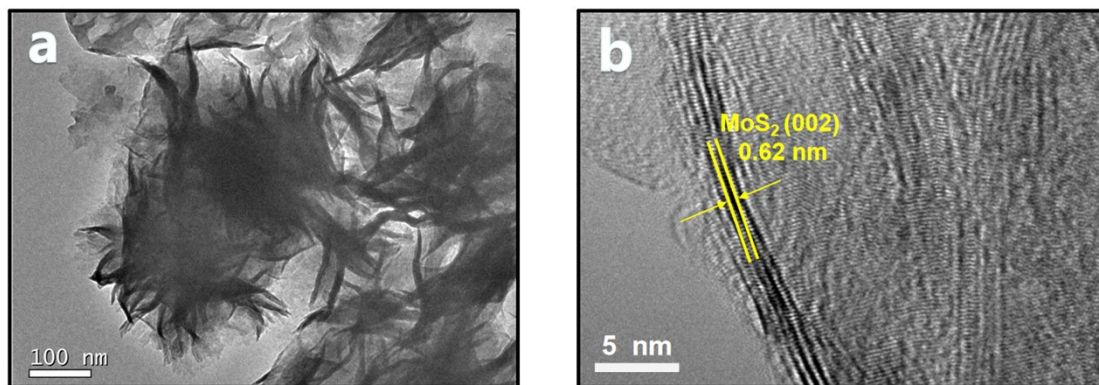

Fig. S7. (a) TEM and (b) HRTEM images of  $\text{MoS}_2$  NSs.  $\text{MoS}_2$  NSs were prepared by a hydrothermal method reported in our previous work[7].

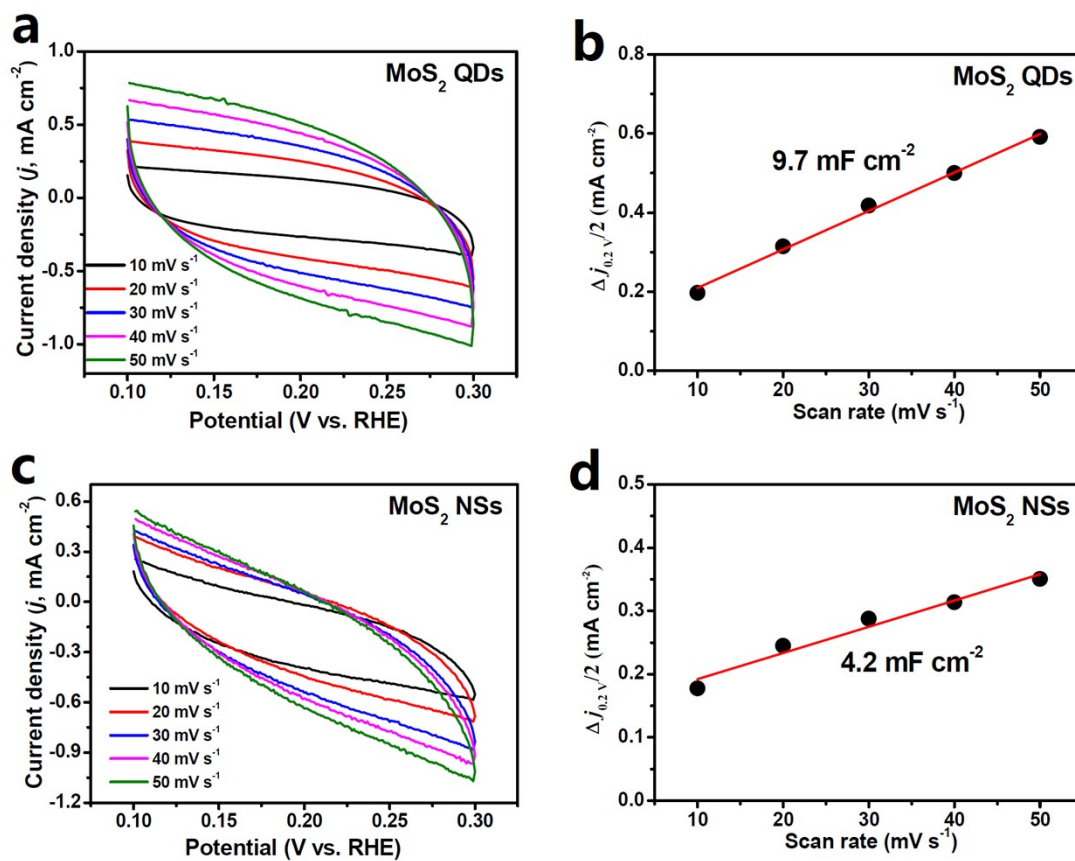

Fig. S8. Electrochemical double-layer capacitance ( $C_{dl}$ ) measurements at different scanning rates of 10~50 mV s<sup>-1</sup> for (a, b) MoS<sub>2</sub> QDs and (c, d) MoS<sub>2</sub> NSs.

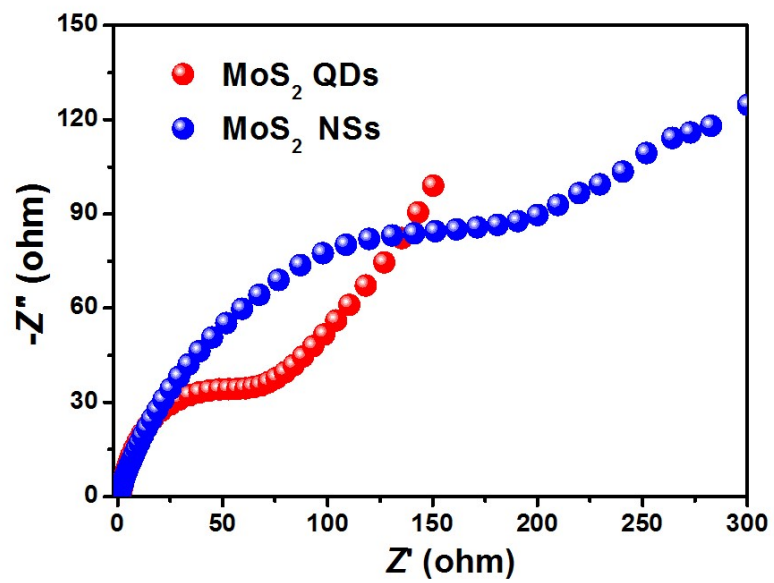

Fig. S9. Electrochemical impedance spectra of MoS<sub>2</sub> QDs and MoS<sub>2</sub> NSs.

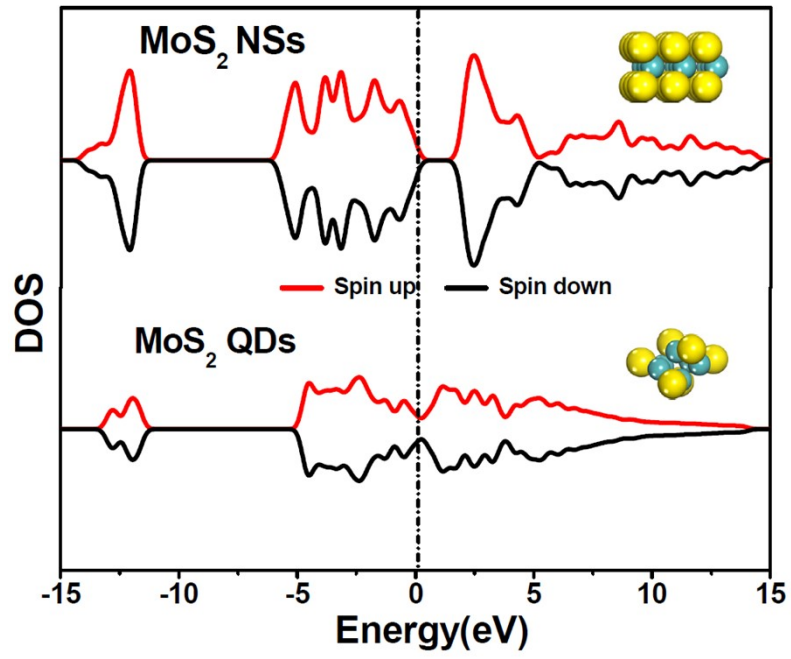

Fig. S10. DOS of MoS<sub>2</sub> QDs and MoS<sub>2</sub> NSs.

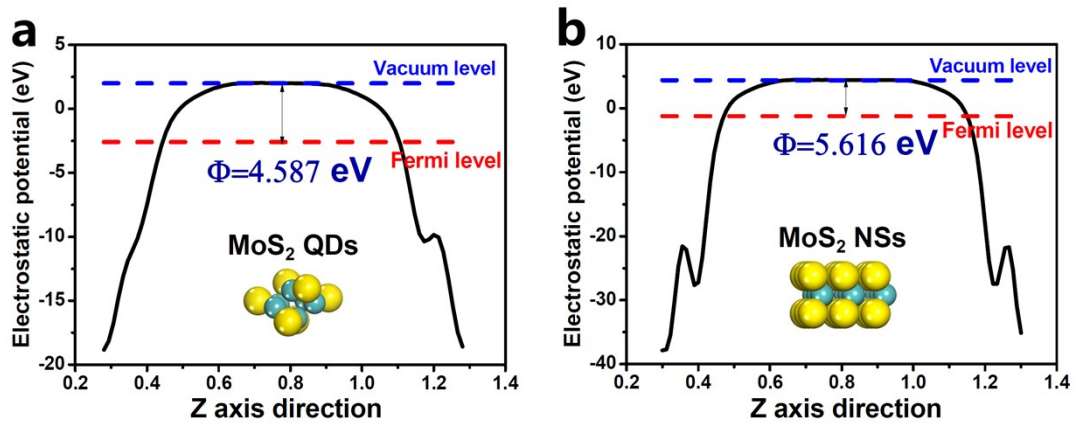

Fig. S11. Average potential profiles along c-axis direction for calculating the work functions of (a) MoS<sub>2</sub> QDs and (b) MoS<sub>2</sub> NSs.

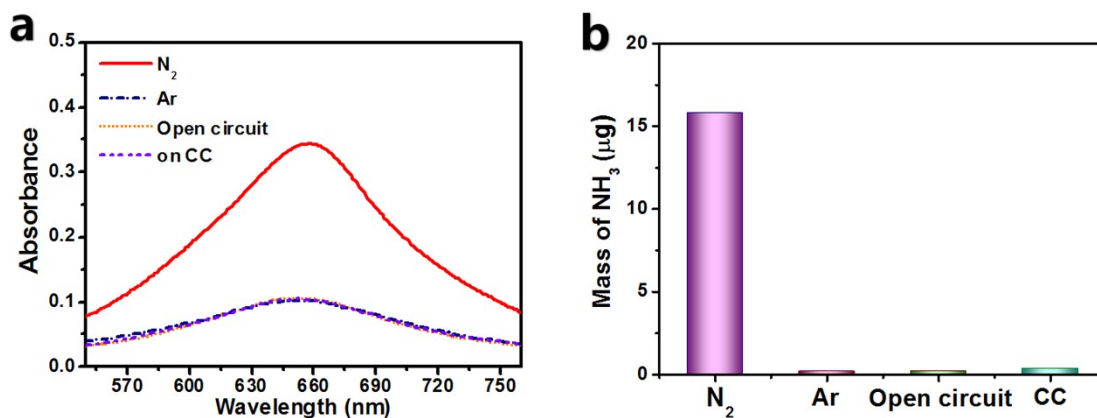

Fig. S12. (a) UV-vis absorption spectra of working electrolytes after 2 h of electrolysis in Ar-saturated solutions on  $MoS_2$  QDs at -0.3 V,  $N_2$ -saturated solution on  $MoS_2$  QDs at open circuit, and  $N_2$ -saturated solution on pristine CC at -0.3 V, and corresponding (b) Mass of produced  $NH_3$ .



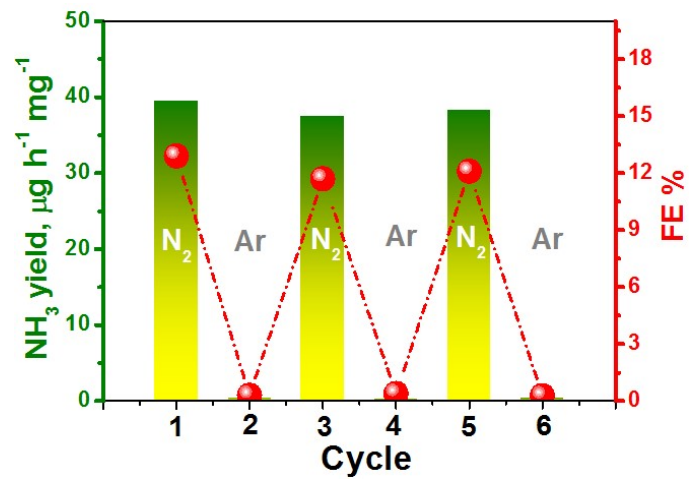

Fig. S13. Alternating cycling test in Ar- and N<sub>2</sub>-saturated solution over MoS<sub>2</sub> QDs at -0.3 V.

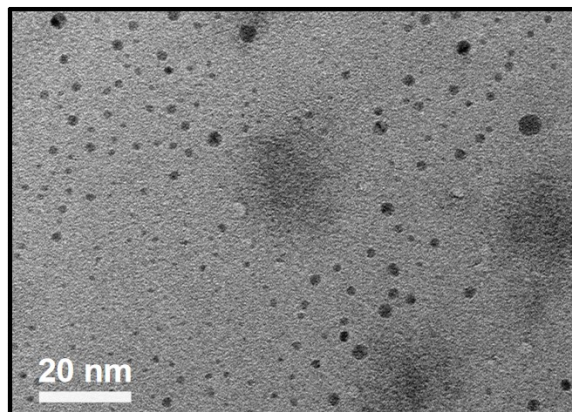

Fig. S14. Morphologies of MoS<sub>2</sub> QDs after stability test.

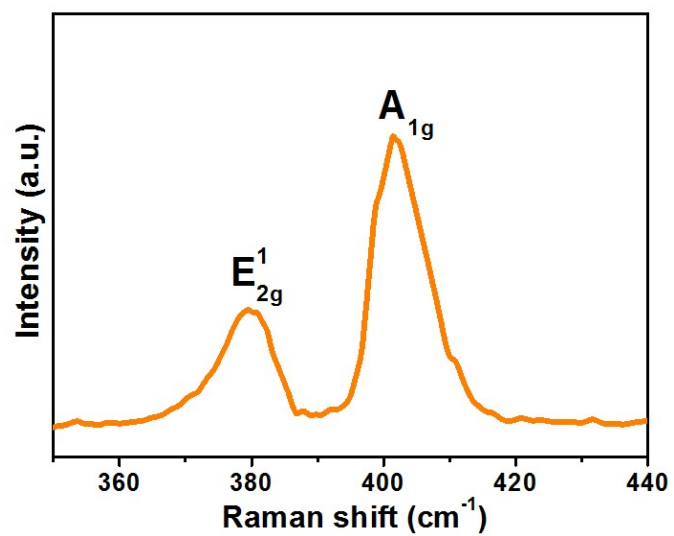

Fig. S15. Raman spectra of MoS<sub>2</sub> QDs after stability test.

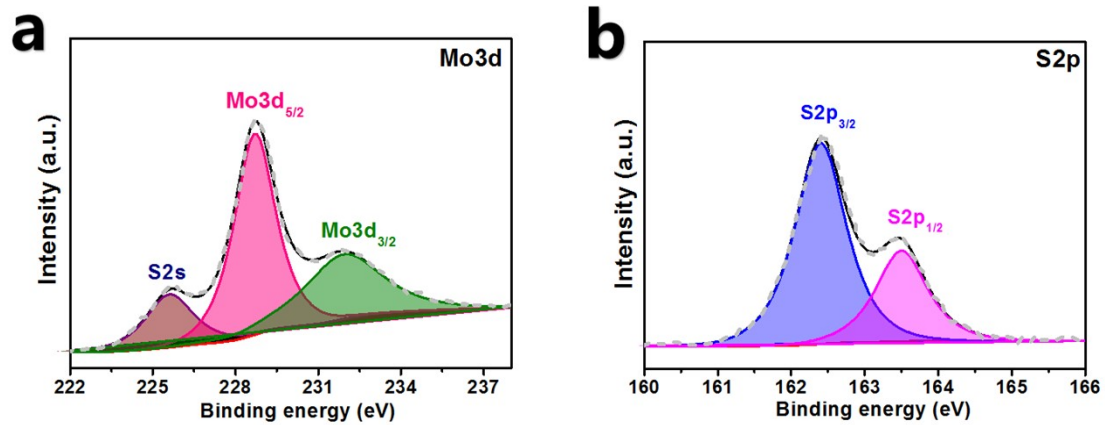

Fig. S16. XPS spectra of MoS<sub>2</sub> QDs after stability test: (a) Mo3d; (b) S2p.

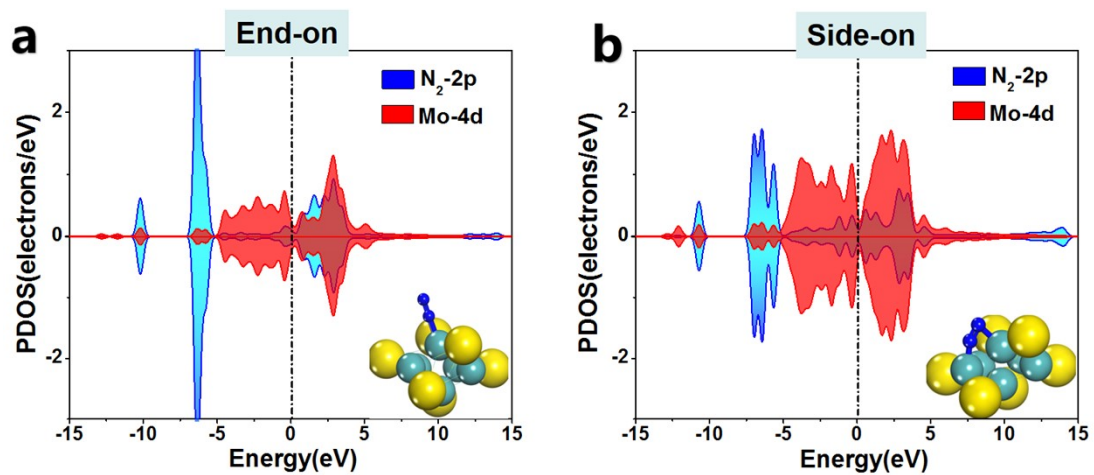

Fig. S17. PDOS of \*N<sub>2</sub> on MoS<sub>2</sub> QDs via (a) end-on pattern and (b) side on pattern.

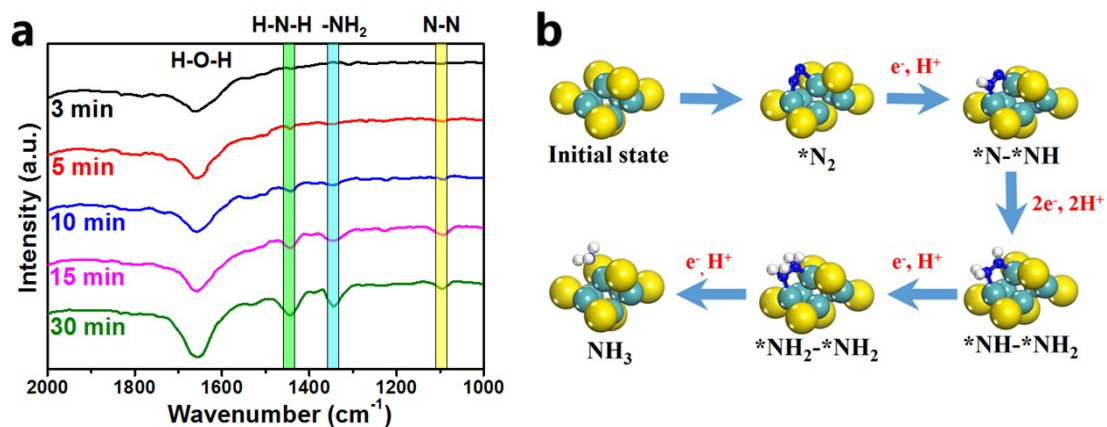

Fig. S18. (a) in-situ FT-IR spectra on MoS<sub>2</sub> QDs during the NRR electrocatalysis at various times (3-30 min) under -0.3 V. The in-situ FT-IR test follows the same procedure reported elsewhere[8]. (b) Proposed NRR associative pathway on MoS<sub>2</sub> QDs.

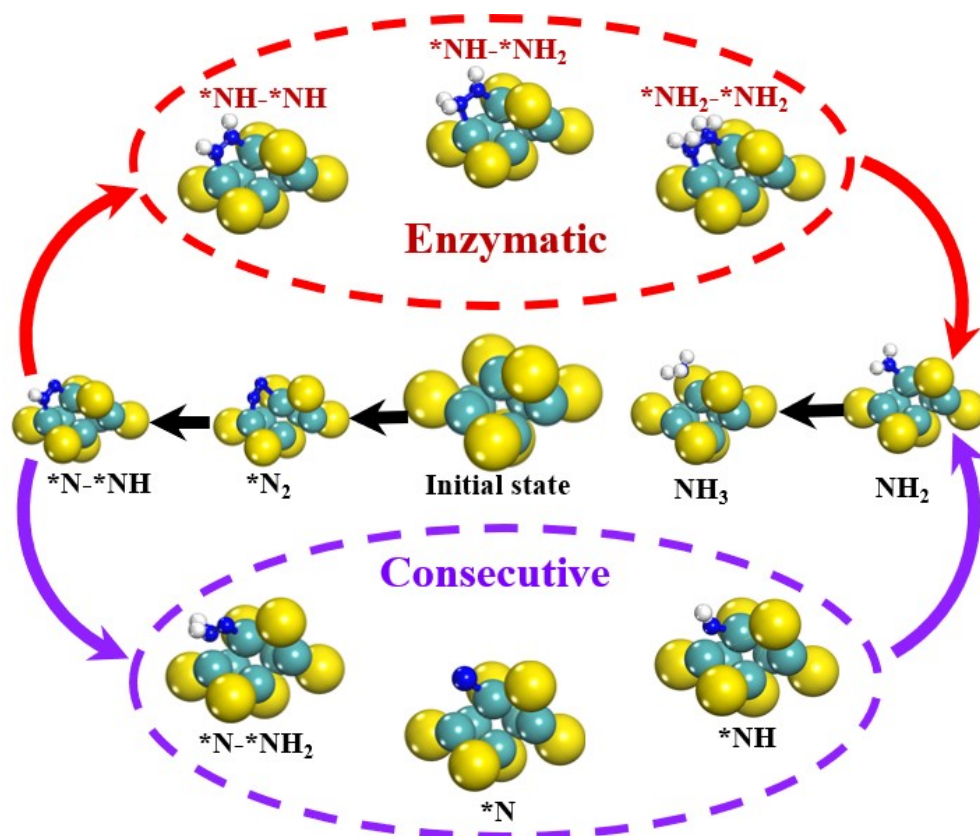

Fig. S19. Schematic of the enzymatic and consecutive NRR pathways on MoS<sub>2</sub> QDs and corresponding optimized structures of reaction intermediates.

Table S1. Comparison of the optimum NH<sub>3</sub> yield and Faradic efficiency (FE) for state-of-the-art NRR electrocatalysts at ambient conditions

| Catalyst                                            | Electrolyte                              | Potential<br>(V vs<br>RHE) | NH <sub>3</sub><br>yield rate                                    | FE(%)       | Ref.             |
|-----------------------------------------------------|------------------------------------------|----------------------------|------------------------------------------------------------------|-------------|------------------|
| Pd/C                                                | 0.1 M PBS                                | 0.1                        | 4.5<br>μg h <sup>-1</sup> mg <sup>-1</sup>                       | 8.2         | [9]              |
| CoP hollow nanocage                                 | 1.0 M KOH                                | -0.4                       | 10.78<br>μg h <sup>-1</sup> mg <sup>-1</sup>                     | 7.36        | [10]             |
| Mo single atoms                                     | 0.1 M KOH                                | -0.3                       | 34<br>μg h <sup>-1</sup> mg <sup>-1</sup>                        | 14.6        | [11]             |
| MoO <sub>2</sub> with oxygen<br>vacancies           | 0.1 M HCl                                | -0.15                      | 12.2<br>μg h <sup>-1</sup> mg <sup>-1</sup>                      | 8.2         | [12]             |
| Mosaic Bi nanosheets                                | 0.1 M<br>Na <sub>2</sub> SO <sub>4</sub> | -0.8                       | 13.23<br>μg h <sup>-1</sup> mg <sup>-1</sup>                     | 10.46       | [13]             |
| Mo <sub>2</sub> C/C                                 | 0.5 M<br>Li <sub>2</sub> SO <sub>4</sub> | -0.3                       | 11.3<br>μg h <sup>-1</sup> mg <sup>-1</sup>                      | 7.8         | [14]             |
| MoS <sub>2</sub> nanosheets                         | 0.1 M<br>Na <sub>2</sub> SO <sub>4</sub> | -0.5                       | 8.08 × 10 <sup>-11</sup><br>mol s <sup>-1</sup> cm <sup>-2</sup> | 1.17        | [15]             |
| Defect-rich MoS <sub>2</sub><br>nanoflower          | 0.1 M<br>Na <sub>2</sub> SO <sub>4</sub> | -0.4                       | 29.28<br>μg h <sup>-1</sup> mg <sup>-1</sup>                     | 8.34        | [16]             |
| MoS <sub>2</sub> with Li-S<br>Interactions          | 0.1 M<br>Li <sub>2</sub> SO <sub>4</sub> | -0.2                       | 43.4<br>μg h <sup>-1</sup> mg <sup>-1</sup>                      | 9.81        | [17]             |
| MoS <sub>2</sub> /RGO                               | 0.1 M HCl                                | -0.45                      | 24.82<br>μg h <sup>-1</sup> mg <sup>-1</sup>                     | 4.58        | [18]             |
| Defective MoS <sub>2</sub>                          | 0.1 M<br>Na <sub>2</sub> SO <sub>4</sub> | -0.5                       | 29.55 μg h <sup>-1</sup><br>mg <sup>-1</sup>                     | 4.58        | [19]             |
| V <sub>S</sub> -MoS <sub>2</sub>                    | 0.1 M<br>Na <sub>2</sub> SO <sub>4</sub> | -0.4                       | 46.1 × 10 <sup>-11</sup><br>mol s <sup>-1</sup> cm <sup>-2</sup> | 4.58        | [20]             |
| Cu <sub>2-x</sub> S/MoS <sub>2</sub>                | 0.1 M<br>Na <sub>2</sub> SO <sub>4</sub> | -0.5                       | 22.1 μg h <sup>-1</sup><br>mg <sup>-1</sup>                      | 6.06        | [21]             |
| 1T-MoS <sub>2</sub> @Ti <sub>3</sub> C <sub>2</sub> | 0.1 M HCl                                | -0.3                       | 30.33 μg h <sup>-1</sup><br>mg <sup>-1</sup>                     | 10.94       | [22]             |
| MoS <sub>2</sub> /C <sub>3</sub> N <sub>4</sub>     | 0.1 M<br>LiClO <sub>4</sub>              | -0.3                       | 18.5 μg h <sup>-1</sup><br>mg <sup>-1</sup>                      | 17.8        | [7]              |
| MoS <sub>2</sub> nanodots/RGO                       | 0.1 M<br>Na <sub>2</sub> SO <sub>4</sub> | -0.75                      | 16.41 μg h <sup>-1</sup><br>mg <sup>-1</sup>                     | 27.93       | [23]             |
| <b>MoS<sub>2</sub> QDs</b>                          | <b>0.5 M<br/>LiClO<sub>4</sub></b>       | <b>-0.3</b>                | <b>39.6 μg h<sup>-1</sup><br/>mg<sup>-1</sup></b>                | <b>12.9</b> | <b>This work</b> |



## Supplementary references

- [1]. D. Zhu, L. Zhang, R. E. Ruther and R. J. Hamers, *Nat. Mater.*, 2013, **12**, 836.
- [2]. G. W. Watt and J. D. Chrisp, *Anal. Chem.*, 1952, **24**, 2006-2008.
- [3]. J. Wang, H. Nan, Y. Tian and K. Chu, *ACS Sustain. Chem. Eng.*, 2020, **8**, 12733-12740.
- [4]. Y. Liu, Y. Luo, Q. Li, J. Wang and K. Chu, *Chem. Commun.*, 2020, **56**, 10227-10230.
- [5]. Q. Li, Y. Cheng, X. Li, Y. Guo and K. Chu, *Chem. Commun.*, 2020, **56**, 13009-13012.
- [6]. A. A. Peterson, *Energy Environ. Sci.*, 2010, **3**, 1311-1315.
- [7]. K. Chu, Y. P. Liu, Y. B. Li, Y. L. Guo and Y. Tian, *ACS Appl. Mater. Inter.*, 2020, **12**, 7081-7090.
- [8]. R. Hao, W. Sun, Q. Liu, X. Liu, J. Chen, X. Lv, W. Li, Y. p. Liu and Z. Shen, *Small*, 2020, **16**, 2000015.
- [9]. J. Wang, L. Yu, L. Hu, G. Chen, H. Xin and X. Feng, *Nat. Commun.*, 2018, **9**, 1795.
- [10]. W. Guo, Z. Liang, J. Zhao, B. Zhu, K. Cai, R. Zou and Q. Xu, *Small Methods*, 2018, **2**, 1800204.
- [11]. L. Han, X. Liu, J. Chen, R. Lin, H. Liu, F. Lu, S. Bak, Z. Liang, S. Zhao and E. Stavitski, *Angew. Chem. Int. Edit.*, 2018, **58**, 2321-2325.
- [12]. G. Zhang, Q. Ji, K. Zhang, Y. Chen, Z. Li, H. Liu, J. Li and J. Qu, *Nano Energy*, 2019, **59**, 10-16.
- [13]. L. Li, C. Tang, B. Xia, H. Jin, Y. Zheng and S.-Z. Qiao, *ACS Catal.*, 2019, **9**, 2902-2908.
- [14]. H. Cheng, L. X. Ding, G. F. Chen, L. Zhang, J. Xue and H. Wang, *Adv. Mater.*, 2018, **30**, 1803694.
- [15]. L. Zhang, X. Ji, X. Ren, Y. Ma, X. Shi, Z. Tian, A. M. Asiri, L. Chen, B. Tang and X. Sun, *Adv. Mater.*, 2018, **30**, 1800191.
- [16]. X. Li, T. Li, Y. Ma, Q. Wei, W. Qiu, H. Guo, X. Shi, P. Zhang, A. M. Asiri and L. Chen, *Adv. Energy. Mater.*, 2018, **8**, 1801357.
- [17]. Y. Liu, M. Han, Q. Xiong, S. Zhang, C. Zhao, W. Gong, G. Wang, H. Zhang and H. Zhao, *Adv. Energy. Mater.*, 2019, **9**, 1803935.
- [18]. X. Li, X. Ren, X. Liu, J. Zhao, X. Sun, Y. Zhang, X. Kuang, T. Yan, Q. Wei and D. Wu, *J. Mater. Chem. A*, 2019, **7**, 2524-2528.
- [19]. B. Liu, C. Ma, D. Liu and S. Yan, *ChemElectroChem*, 2021, DOI: 10.1002/celec.202100534.
- [20]. C. Ma, N. Zhai, B. Liu and S. Yan, *Electrochim. Acta*, 2021, **370**.
- [21]. T. Jiang, L. Li, L. Li, Y. Liu, D. Zhang, D. Zhang, H. Li, B. Mao and W. Shi, *Chem. Eng. J.*, 2021, **426**.
- [22]. X. Xu, B. Sun, Z. Liang, H. Cui and J. Tian, *ACS Appl. Mater. Inter.*, 2020, **12**, 26060-26067.
- [23]. Y. Liu, W. Wang, S. Zhang, W. Li, G. Wang, Y. Zhang, M. Han and H. Zhang, *ACS Sustain. Chem. Eng.*, 2020, **8**, 2320-2326.
